# Supplementary material for: Understanding PIM-1 kinase inhibitor interactions with free energy simulation
Source: Royal Society of Chemistry journal article supplement (doi:10.1039/c9cp00070d), 2019-01-01
Supplement: c9cp00070d1.pdf [file c9cp00070d1.pdf]

## **Supporting Information: Understanding PIM-1 kinase Inhibitors Interactions with Free Energy Simulation**

Xiaohui Wang<sup>1,3</sup> and Zhaoxi Sun<sup>1,2\*</sup>

<sup>1</sup>*State Key Laboratory of Precision Spectroscopy, School of Chemistry and Molecular Engineering, East China Normal University, Shanghai 200062, China*

<sup>2</sup>*Computational Biomedicine (IAS-5/INM-9), Forschungszentrum Jülich, Jülich 52425, Germany*

<sup>3</sup>*Institute of Computational Science, Università della Svizzera italiana (USI), Via Giuseppe Buffi 13, CH-6900, Lugano, Ticino, Switzerland*

\*To whom correspondence should be addressed: [z.sun@fz-juelich.de](mailto:z.sun@fz-juelich.de)

**Table S1.** Detailed free energy differences from TI, BAR and MBAR. All values are given in kcal/mol. The ligand of B08 is used as the reference.

| ligands-only           |                        |      |                         |      |                          |      |
|------------------------|------------------------|------|-------------------------|------|--------------------------|------|
| ligands                | $\Delta G_{\text{TI}}$ | SD   | $\Delta G_{\text{BAR}}$ | SD   | $\Delta G_{\text{MBAR}}$ | SD   |
| STA                    | 5.88                   | 0.98 | 5.78                    | 0.24 | 5.37                     | 0.25 |
| B09                    | -8.33                  | 1.27 | -7.69                   | 0.26 | -7.43                    | 0.25 |
| B01                    | -3.39                  | 1.80 | -2.71                   | 0.32 | -3.76                    | 0.30 |
| B08                    | 0.00                   | 0.00 | 0.00                    | 0.00 | 0.00                     | 0.00 |
| IM1                    | 4.45                   | 1.25 | 4.64                    | 0.27 | 4.92                     | 0.20 |
| B04                    | -1.92                  | 0.86 | -3.04                   | 0.21 | -3.54                    | 0.23 |
| B10                    | -10.36                 | 1.16 | -10.92                  | 0.30 | -10.61                   | 0.28 |
| B11                    | -3.50                  | 1.64 | -3.52                   | 0.36 | -2.95                    | 0.38 |
| protein-ligand complex |                        |      |                         |      |                          |      |
| ligands                | $\Delta G_{\text{TI}}$ | SD   | $\Delta G_{\text{BAR}}$ | SD   | $\Delta G_{\text{MBAR}}$ | SD   |
| STA                    | 6.39                   | 2.64 | 5.50                    | 0.52 | 4.79                     | 0.44 |
| B09                    | -6.23                  | 3.35 | -4.61                   | 0.50 | -5.26                    | 0.52 |
| B01                    | -5.05                  | 1.72 | -3.97                   | 0.35 | -4.47                    | 0.30 |
| B08                    | 0.00                   | 0.00 | 0.00                    | 0.00 | 0.00                     | 0.00 |
| IM1                    | 5.04                   | 3.36 | 6.03                    | 0.46 | 5.71                     | 0.33 |
| B04                    | -2.21                  | 1.20 | -3.76                   | 0.28 | -3.46                    | 0.28 |
| B10                    | -5.25                  | 1.40 | -5.44                   | 0.43 | -8.84                    | 0.34 |
| B11                    | -1.20                  | 1.40 | -1.94                   | 0.32 | -1.03                    | 0.33 |

**Table S2.** Detailed free energy differences from MM/PBSA and MM/GBSA.  $\Delta H_{\text{gas}}$  is the gas-phase enthalpy change upon binding or the protein-ligand interaction energy.  $\Delta G_{\text{sol}}$  is the solvation free energy and the subscripts of PB and GB denote the implicit solvent model used to calculate the solvation free energy.  $\Delta\Delta G_{\text{MM/PBSA}}$  and  $\Delta\Delta G_{\text{MM/GBSA}}$  are the relative binding affinity of ligands with B08 as the reference.

| Ligand | $\Delta H_{\text{gas}}$ | SD  | $\Delta G_{\text{sol,PB}}$ | SD  | $\Delta G_{\text{sol,GB}}$ | SD  | MM/PBSA | SD  | MM/GBSA | SD  | $\Delta\Delta G_{\text{MM/PBSA}}$ | SD  | $\Delta\Delta G_{\text{MM/GBSA}}$ | SD  |
|--------|-------------------------|-----|----------------------------|-----|----------------------------|-----|---------|-----|---------|-----|-----------------------------------|-----|-----------------------------------|-----|
| STA    | -74.4                   | 0.2 | 66.8                       | 0.2 | 26.3                       | 0.1 | -7.6    | 0.3 | -48.1   | 0.2 | -3.4                              | 0.4 | -5.9                              | 0.3 |
| B09    | -94.8                   | 0.3 | 87.2                       | 0.2 | 47.1                       | 0.2 | -7.6    | 0.3 | -47.7   | 0.3 | -3.5                              | 0.4 | -5.5                              | 0.4 |
| B01    | -78.8                   | 0.2 | 77.0                       | 0.2 | 37.3                       | 0.1 | -1.7    | 0.2 | -41.5   | 0.2 | 2.4                               | 0.4 | 0.7                               | 0.3 |
| B08    | -80.9                   | 0.2 | 76.8                       | 0.2 | 38.7                       | 0.2 | -4.1    | 0.3 | -42.2   | 0.3 | 0.0                               | 0.4 | 0.0                               | 0.3 |
| IM1    | -41.2                   | 0.1 | 39.5                       | 0.1 | 12.1                       | 0.1 | -1.8    | 0.2 | -29.2   | 0.1 | 2.3                               | 0.3 | 13.0                              | 0.3 |
| B04    | -57.9                   | 0.1 | 59.5                       | 0.1 | 27.7                       | 0.1 | 1.6     | 0.2 | -30.2   | 0.2 | 5.7                               | 0.3 | 12.0                              | 0.3 |
| B10    | -70.0                   | 0.3 | 70.6                       | 0.2 | 35.1                       | 0.2 | 0.6     | 0.3 | -34.9   | 0.3 | 4.7                               | 0.4 | 7.2                               | 0.4 |
| B11    | -69.7                   | 0.2 | 69.8                       | 0.2 | 33.5                       | 0.1 | 0.1     | 0.2 | -36.2   | 0.2 | 4.3                               | 0.3 | 6.0                               | 0.3 |

**Table S3.** The interaction energies between the ligand and the protein residues and their decompositions into the electrostatic and vdW components.

| Important residues |        | Interaction Energy (kcal/mol) |      |      |      |      |      |      |      |
|--------------------|--------|-------------------------------|------|------|------|------|------|------|------|
| type               | number | STA                           | B09  | B01  | B08  | IM1  | B04  | B10  | B11  |
| GLU                | 121    | -5.7                          | -4.1 | -3.5 | -3.8 | -2.1 | -3.8 | -4.1 | -3.8 |
| ARG                | 122    | -8.9                          | -7.5 | -7.8 | -7.9 | -5.4 | -7.8 | -6.8 | -6.7 |
| GLU                | 171    | -7.3                          | -1.7 | -7.9 | -7.0 | 0.1  | -3.5 | -5.2 | -0.9 |
| ILE                | 104    | -1.7                          | -2.1 | -2.1 | -2.1 | -2.8 | -1.9 | -2.0 | -1.9 |
| PRO                | 123    | 0.4                           | 0.1  | 0.1  | 0.0  | 0.6  | -0.1 | -0.2 | -0.6 |
| PHE                | 49     | -5.2                          | -5.4 | -5.4 | -5.0 | -2.4 | -2.4 | -3.9 | -4.4 |
| LEU                | 120    | -1.4                          | -3.4 | -3.9 | -4.2 | -1.7 | -4.0 | -3.9 | -3.7 |
| ASP                | 128    | -6.6                          | -7.5 | -6.5 | -7.6 | -5.2 | -6.8 | -2.5 | -6.5 |
| SER                | 46     | -0.6                          | -1.5 | -0.6 | -0.2 | 0.0  | -0.5 | -0.4 | -0.4 |
| ILE                | 173    | -0.5                          | -0.5 | -0.9 | -0.7 | -0.3 | -0.5 | -1.6 | -0.5 |
| LEU                | 44     | -6.7                          | -7.0 | -6.6 | -6.7 | -6.4 | -6.5 | -7.0 | -6.8 |
| ASP                | 186    | -4.0                          | -5.1 | -6.0 | -9.2 | -6.0 | -6.2 | -6.9 | -5.7 |
| ILE                | 185    | -7.7                          | -6.1 | -6.7 | -7.1 | -6.4 | -5.3 | -7.7 | -7.2 |
| VAL                | 126    | -2.1                          | -2.0 | -1.8 | -1.8 | -1.2 | -1.6 | -1.0 | -1.3 |

| Important residues |        | Electrostatic Interaction Energy (kcal/mol) |      |      |      |      |      |      |      |
|--------------------|--------|---------------------------------------------|------|------|------|------|------|------|------|
| type               | number | STA                                         | B09  | B01  | B08  | IM1  | B04  | B10  | B11  |
| GLU                | 121    | -5.3                                        | -3.5 | -2.8 | -3.2 | -1.6 | -3.3 | -3.5 | -3.1 |
| ARG                | 122    | -7.1                                        | -5.5 | -5.6 | -5.7 | -4.0 | -5.8 | -4.7 | -4.9 |
| GLU                | 171    | -4.6                                        | -1.2 | -5.8 | -5.5 | 0.2  | -3.4 | -4.6 | -0.2 |
| ILE                | 104    | -0.3                                        | -0.3 | -0.2 | -0.3 | -0.6 | -0.2 | -0.3 | -0.3 |
| PRO                | 123    | 1.5                                         | 1.2  | 1.0  | 0.9  | 1.1  | 1.1  | 0.7  | 0.5  |
| PHE                | 49     | -0.1                                        | -0.4 | -0.1 | -0.2 | -0.9 | 0.2  | 0.3  | 0.3  |
| LEU                | 120    | 0.8                                         | -1.3 | -1.5 | -1.6 | 0.3  | -1.5 | -1.5 | -1.1 |
| ASP                | 128    | -4.3                                        | -6.4 | -4.5 | -6.5 | -4.3 | -6.3 | -0.9 | -4.9 |
| SER                | 46     | -0.2                                        | -0.7 | -0.2 | 0.1  | 0.2  | -0.2 | -0.1 | -0.1 |
| ILE                | 173    | -0.2                                        | -0.4 | -0.6 | -0.5 | -0.2 | -0.4 | -0.8 | -0.3 |
| LEU                | 44     | -1.8                                        | -2.1 | -1.7 | -1.8 | -2.1 | -2.0 | -2.2 | -2.4 |
| ASP                | 186    | -0.6                                        | -3.3 | -4.4 | -6.4 | -3.5 | -4.3 | -4.6 | -3.1 |
| ILE                | 185    | -1.3                                        | -1.5 | -1.7 | -2.0 | -1.2 | -1.6 | -2.2 | -2.3 |
| VAL                | 126    | -0.8                                        | -0.4 | -0.3 | -0.2 | 0.4  | -0.4 | -0.1 | -0.2 |

| Important residues |        | vdW Electrostatic Interaction Energy (kcal/mol) |      |      |      |      |      |      |      |
|--------------------|--------|-------------------------------------------------|------|------|------|------|------|------|------|
| type               | number | STA                                             | B09  | B01  | B08  | IM1  | B04  | B10  | B11  |
| GLU                | 121    | -0.5                                            | -0.6 | -0.7 | -0.6 | -0.4 | -0.5 | -0.5 | -0.8 |
| ARG                | 122    | -1.8                                            | -2.0 | -2.1 | -2.2 | -1.5 | -2.1 | -2.1 | -1.9 |
| GLU                | 171    | -2.6                                            | -0.5 | -2.1 | -1.6 | -0.1 | -0.1 | -0.6 | -0.7 |
| ILE                | 104    | -1.5                                            | -1.8 | -1.8 | -1.7 | -2.2 | -1.7 | -1.7 | -1.6 |
| PRO                | 123    | -1.1                                            | -1.1 | -0.9 | -1.0 | -0.5 | -1.1 | -0.8 | -1.2 |
| PHE                | 49     | -5.0                                            | -5.1 | -5.3 | -4.8 | -1.5 | -2.7 | -4.2 | -4.7 |
| LEU                | 120    | -2.3                                            | -2.1 | -2.4 | -2.6 | -2.0 | -2.5 | -2.5 | -2.6 |
| ASP                | 128    | -2.4                                            | -1.1 | -2.0 | -1.1 | -0.9 | -0.6 | -1.6 | -1.6 |
| SER                | 46     | -0.4                                            | -0.8 | -0.4 | -0.3 | -0.2 | -0.2 | -0.3 | -0.3 |
| ILE                | 173    | -0.3                                            | -0.1 | -0.3 | -0.2 | -0.1 | -0.1 | -0.8 | -0.2 |
| LEU                | 44     | -4.8                                            | -5.0 | -4.9 | -4.9 | -4.3 | -4.5 | -4.8 | -4.4 |
| ASP                | 186    | -3.4                                            | -1.8 | -1.6 | -2.8 | -2.5 | -1.9 | -2.3 | -2.6 |
| ILE                | 185    | -6.4                                            | -4.5 | -5.0 | -5.1 | -5.2 | -3.7 | -5.5 | -4.9 |
| VAL                | 126    | -1.3                                            | -1.6 | -1.6 | -1.6 | -1.6 | -1.3 | -0.9 | -1.1 |

**Figure S1.** Hydrogen bonds formed between the ligand and its surroundings in protein-ligand system (left) and ligand-only system (right). The widths of the average lines are the standard error of the mean of the number of hydrogen bonds.

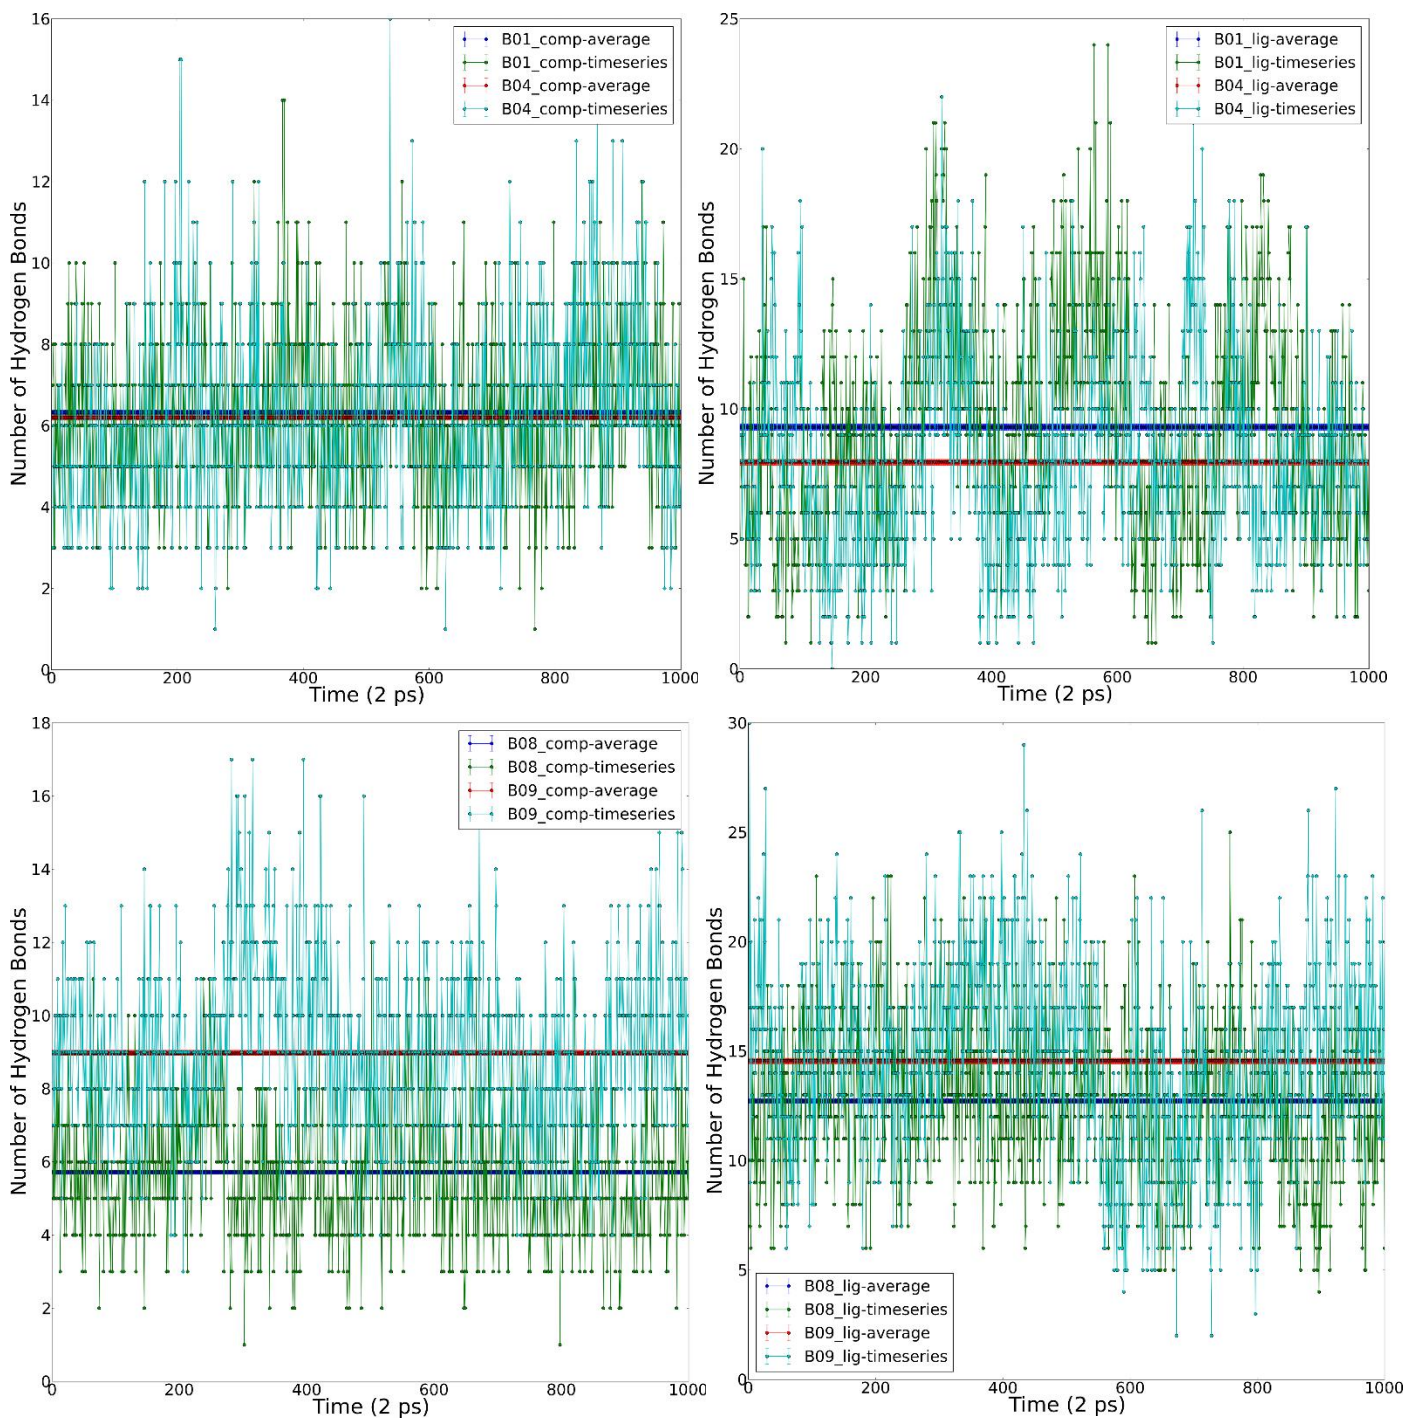

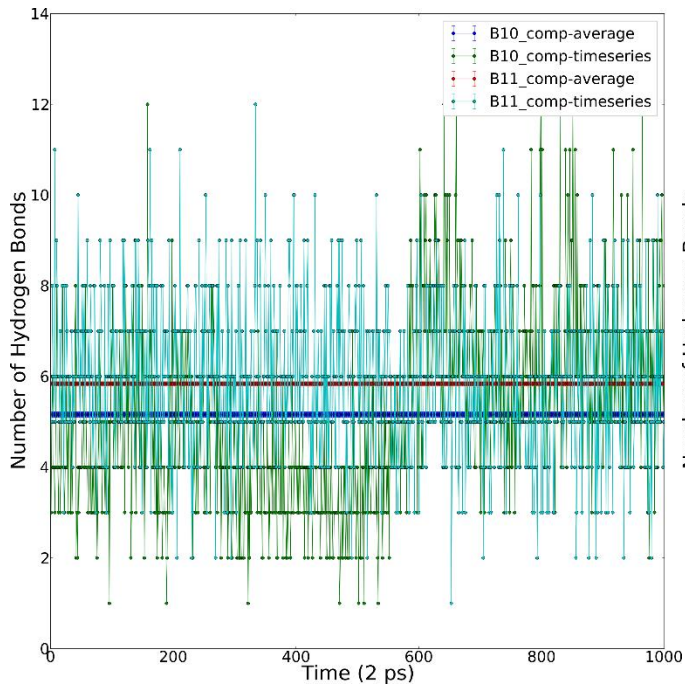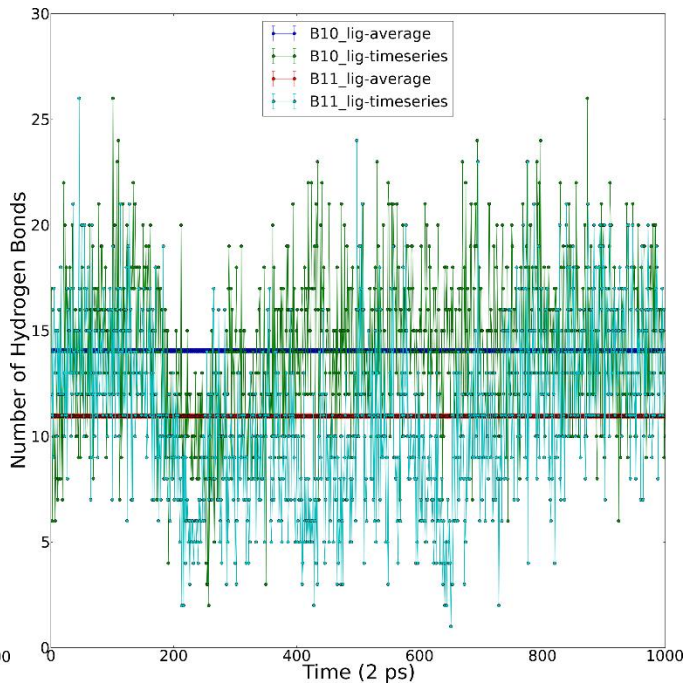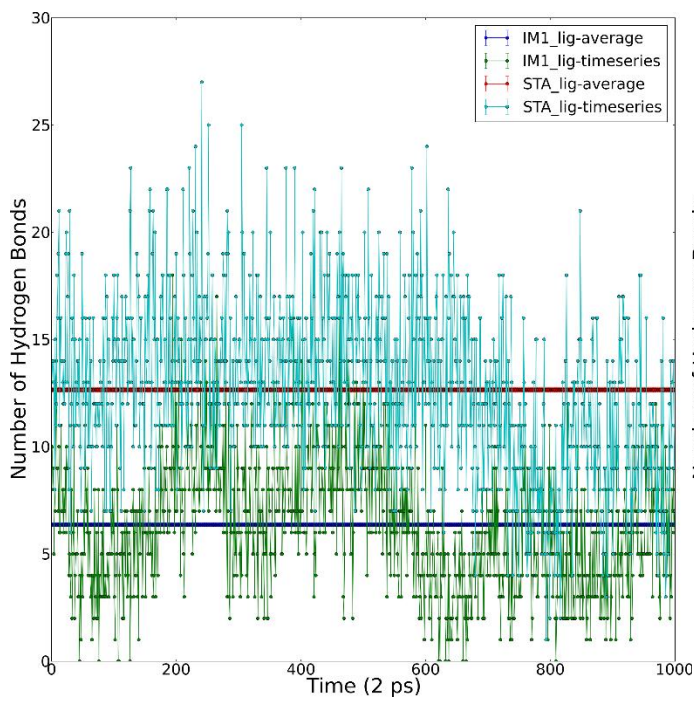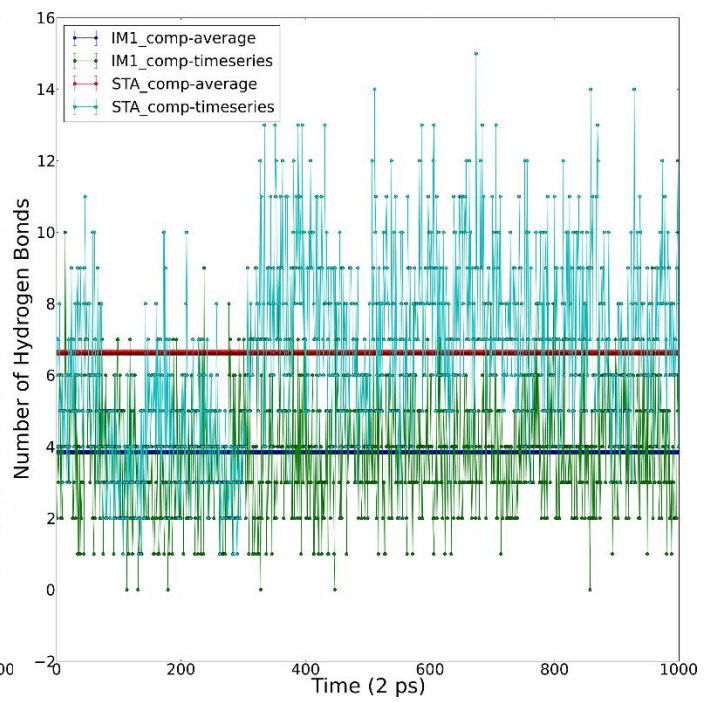

**Figure S2.** Interaction maps for protein-ligand complexes.

B01

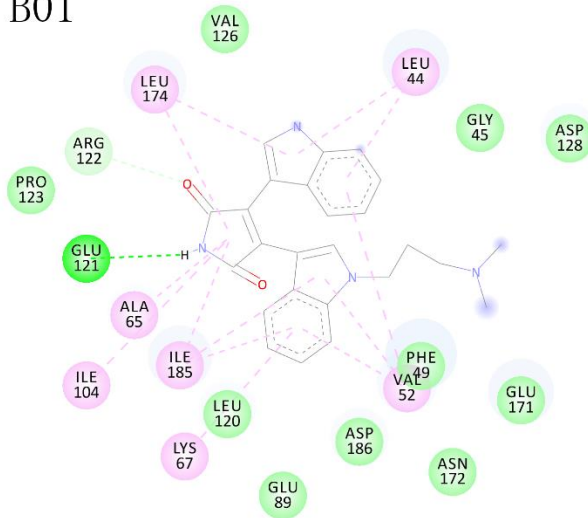

**Interactions**

- van der Waals
- Carbon Hydrogen Bond
- Conventional Hydrogen Bond
- Pi-Alkyl

B04

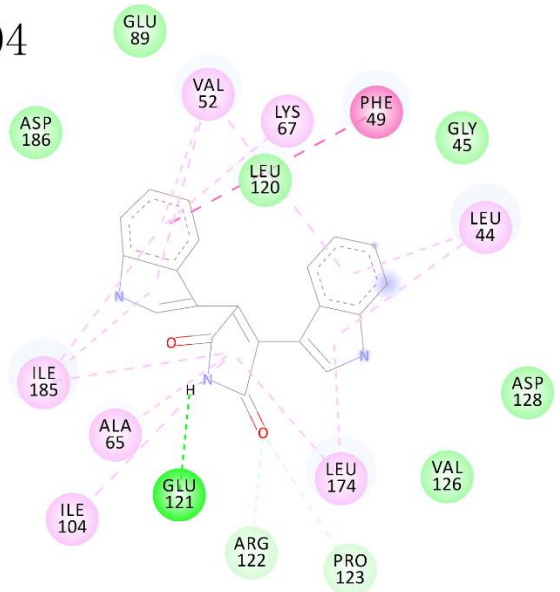

**Interactions**

- van der Waals
- Conventional Hydrogen Bond
- Carbon Hydrogen Bond
- Pi-Pi Stacked
- Pi-Alkyl

B08

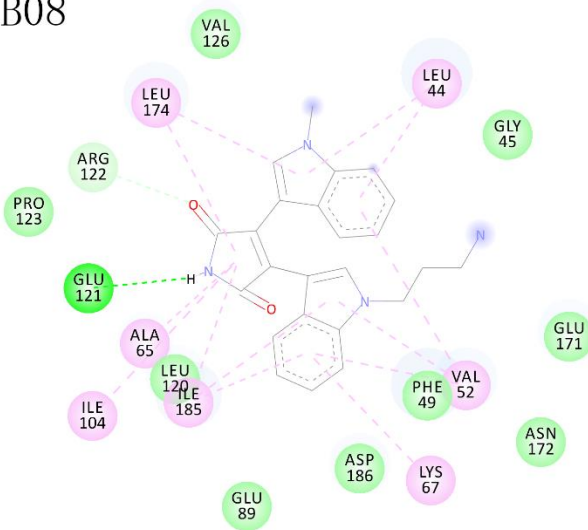

**Interactions**

- van der Waals
- Carbon Hydrogen Bond
- Conventional Hydrogen Bond
- Pi-Alkyl

B09

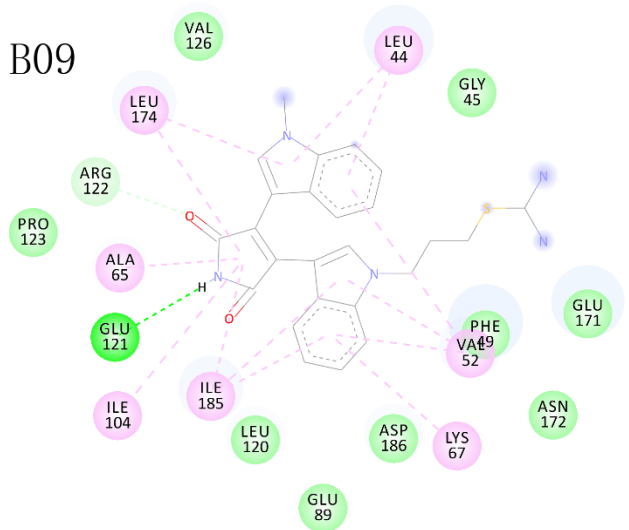

**Interactions**

- van der Waals
- Conventional Hydrogen Bond
- Carbon Hydrogen Bond
- Pi-Alkyl



B10

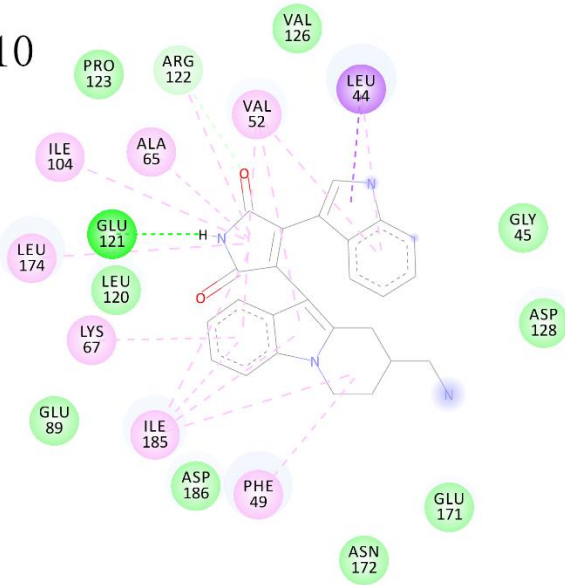

**Interactions**

- van der Waals
- Conventional Hydrogen Bond
- Carbon Hydrogen Bond
- Pi-Sigma
- Alkyl
- Pi-Alkyl

B11

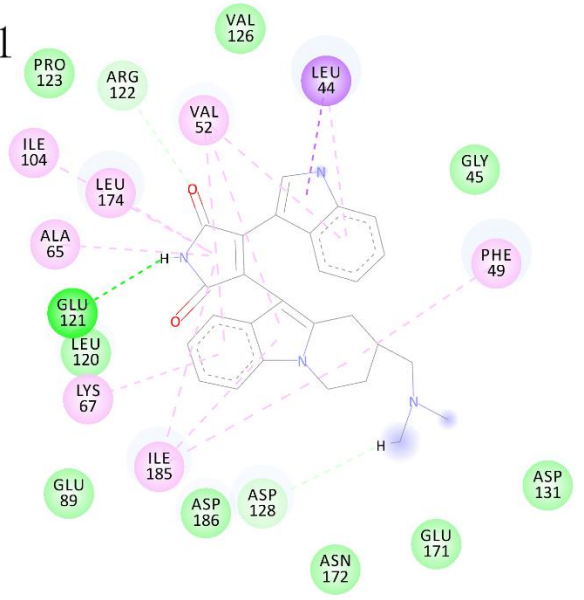

**Interactions**

- van der Waals
- Conventional Hydrogen Bond
- Carbon Hydrogen Bond
- Pi-Sigma
- Alkyl
- Pi-Alkyl

STA

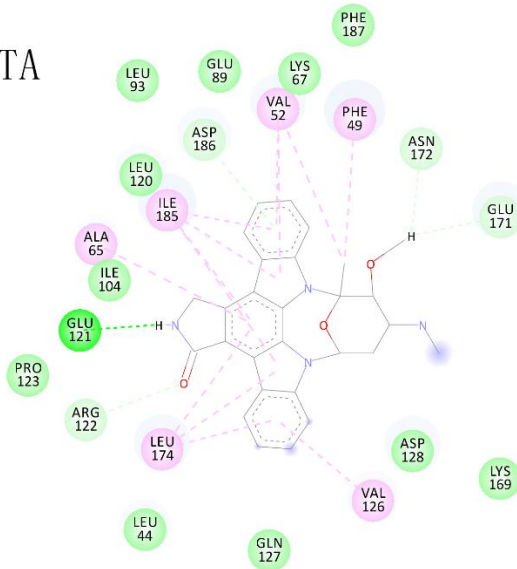

**Interactions**

- van der Waals
- Conventional Hydrogen Bond
- Carbon Hydrogen Bond
- Pi-Donor Hydrogen Bond
- Alkyl
- Pi-Alkyl

IM1

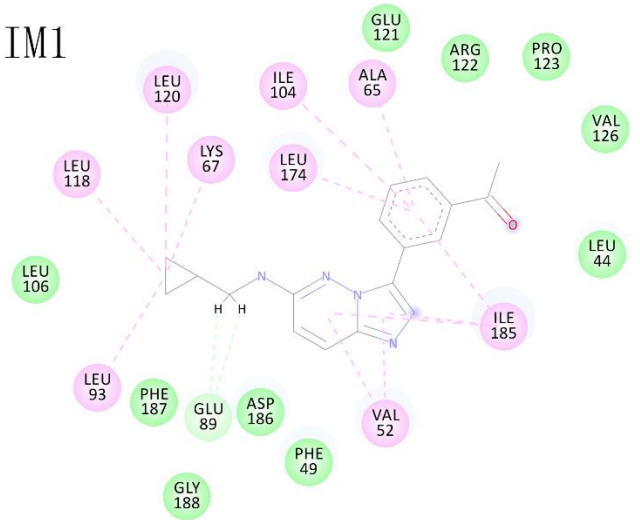

**Interactions**

- van der Waals
- Conventional Hydrogen Bond
- Carbon Hydrogen Bond
- Alkyl
- Pi-Alkyl
